# Supplementary material for: A Sound Velocity Prediction Model for Seafloor Sediments Based on Deep Neural Networks
Source: MDPI journal article supplement (doi:10.3390/rs15184483), 2023-09-12
Supplement: s1 [file s1]

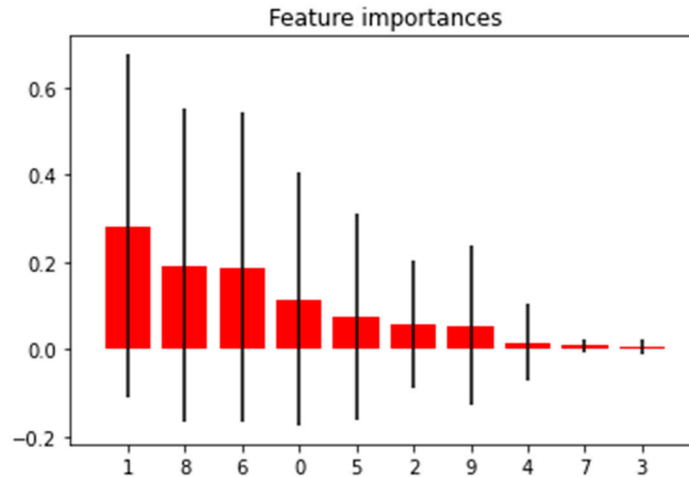

Figure S1. The feature importance of the 10 features. The feature number and corresponding names are shown in Table 1.

Feature importance is used to illustrate the importance of a feature to the model. Generally, the higher the value, the more important the feature is to the model. Here in this DNN model, the most importance feature is the feature 1 (porosity).

The model should be used under the continental shelf and slope environment with the following conditions:

$$1.34 \text{ g/cm}^3 < \rho < 1.95 \text{ g/cm}^3, \quad 43.8\% < n < 81.2\%, \quad 1\% < \text{sand} < 73.8\%, \\ 11.9\% < \text{silt} < 74.8\%,$$

$$6.7\% < \text{clay} < 66.3\%, \quad 3.47 \phi < M_z < 8.51 \phi, \quad 2.66 \phi < M_d < 8.49 \phi.$$

Tables for exponential + linear functions of the input parameters

**Table S1.** The regression equations of input parameters in exponential functions.

| Equations               | Regression Equations                 | R Square |
|-------------------------|--------------------------------------|----------|
| $V_p = f(\rho)$         | $V_p = 1198.9e^{0.1583\rho}$         | 0.7612   |
| $V_p = f(n)$            | $V_p = 1839.5e^{-0.269n}$            | 0.8014   |
| $V_p = f(\text{sand})$  | $V_p = 1493.1e^{0.0013\text{sand}}$  | 0.7269   |
| $V_p = f(\text{silt})$  | $V_p = 1604.9e^{-0.001\text{silt}}$  | 0.2173   |
| $V_p = f(\text{clay})$  | $V_p = 1635.4e^{-0.002\text{clay}}$  | 0.6051   |
| $V_p = f(M_z)$          | $V_p = 1787.7e^{-0.023M_z}$          | 0.7704   |
| $V_p = f(M_d)$          | $V_p = 1725.5e^{-0.018M_d}$          | 0.8262   |
| $V_p = f(\text{dis})$   | $V_p = 1535.5e^{-3E-06\text{dis}}$   | 3E-06    |
| $V_p = f(\text{depth})$ | $V_p = 1572.8e^{-3E-05\text{depth}}$ | 0.3434   |
| $V_p = f(\text{pro})$   | $V_p = 1103.6e^{0.0008\text{pro}}$   | 0.5393   |

**Table S2.** The regression equations of input parameters in linear functions.

| Equations              | Regression Equations                | R Square |
|------------------------|-------------------------------------|----------|
| $V_p = f(\rho)$        | $V_p = 248\rho + 1148.8$            | 0.7563   |
| $V_p = f(n)$           | $V_p = -421.16n + 1819.6$           | 0.7954   |
| $V_p = f(\text{sand})$ | $V_p = 2,0979\text{sand} + 1492.5$  | 0.7269   |
| $V_p = f(\text{silt})$ | $V_p = -1.6016\text{silt} + 1606.1$ | 0.2135   |
| $V_p = f(\text{clay})$ | $V_p = -2,7965\text{clay} + 1635,3$ | 0.5963   |

|                |                         |        |
|----------------|-------------------------|--------|
| $V_p=f(Mz)$    | $V_p=-35.916mz+1775$    | 0.7675 |
| $V_p=f(md)$    | $V_p=-28.125md+1719.4$  | 0.8243 |
| $V_p=f(dis)$   | $V_p=-0.0021dis+1536.2$ | 3E-06  |
| $V_p=f(depth)$ | $V_p=-0.0419depth+1574$ | 0.3543 |
| $V_p=f(pro)$   | $V_p=1.2391pro+1019.4$  | 0.5353 |

Figures for exponential + linear functions of the input parameters

From the Figure S2to S11, we can see that the all “R square” values were reduced even when using an exponential function and a linear function independently, thus we choose the quadratic relationship to compared with the machine learning method in this article.

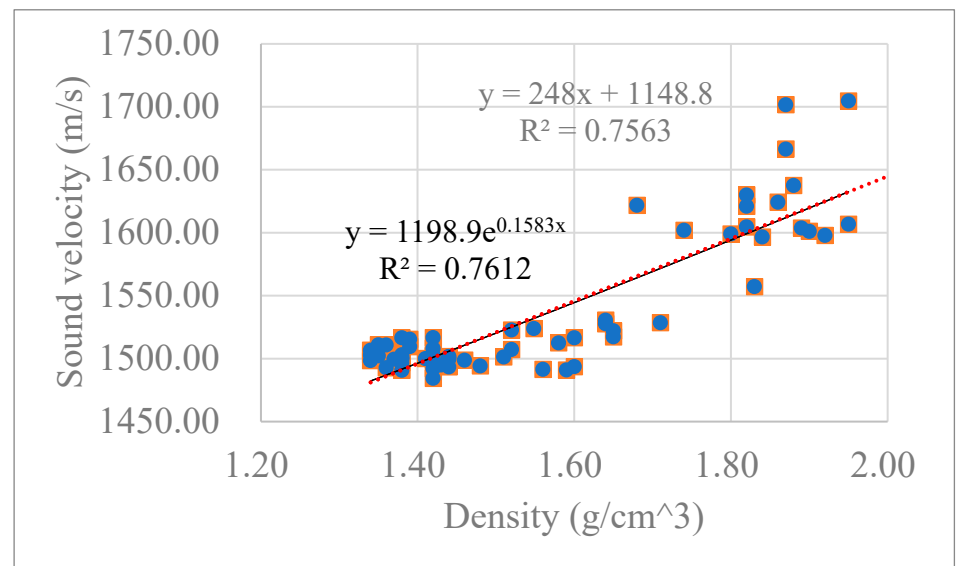

Figure S2. Exponential (black line) + linear (red line) functions of density vs sound velocity

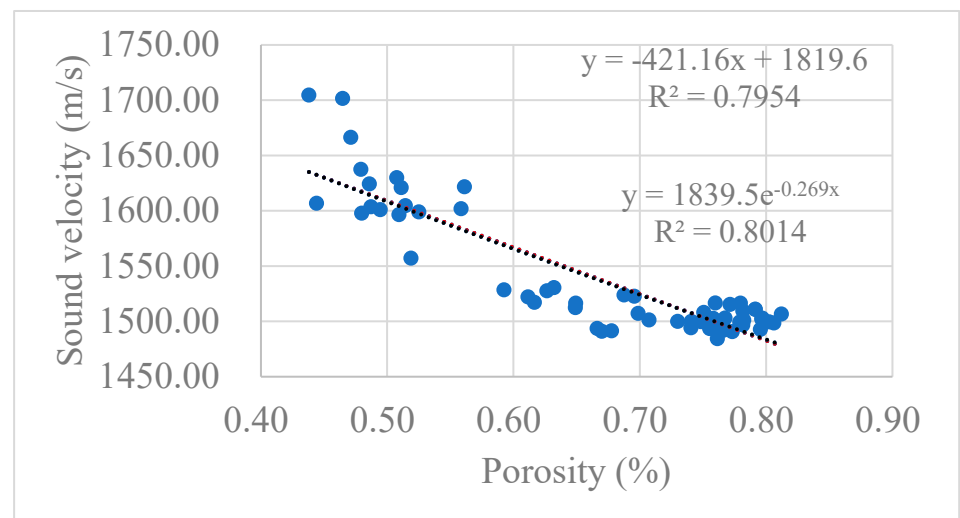

Figure S3. Exponential (black line) + linear (red line) functions of porosity vs sound velocity

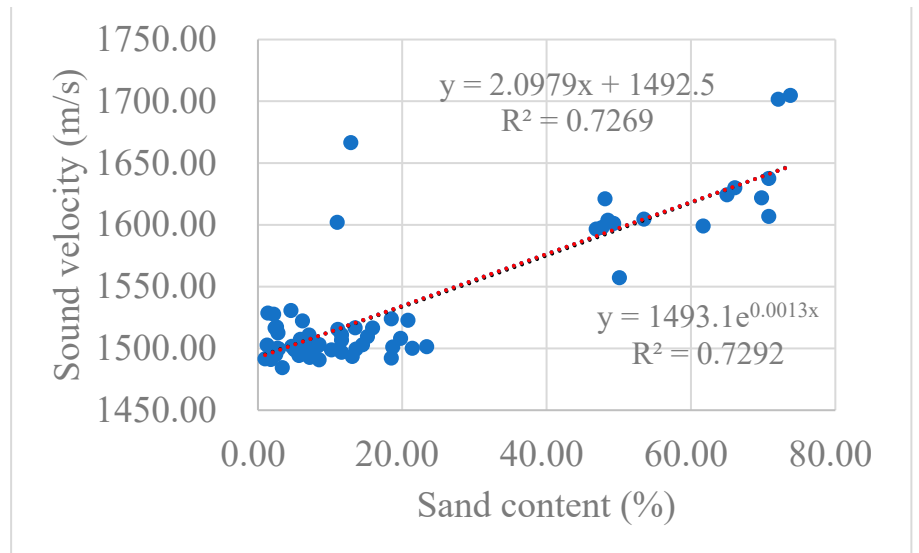

Figure S4. Exponential (black line) + linear (red line) functions of sand content vs sound velocity

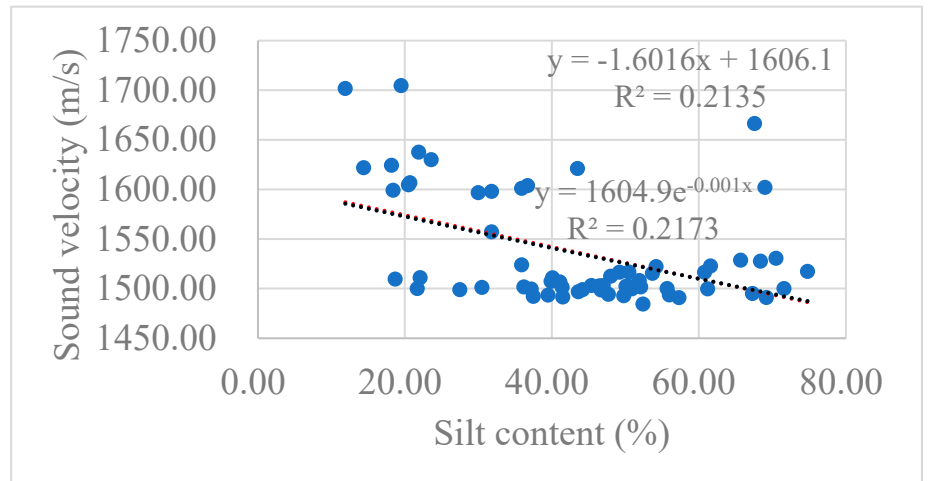

Figure S5. Exponential (black line) + linear (red line) functions of silt content vs sound velocity

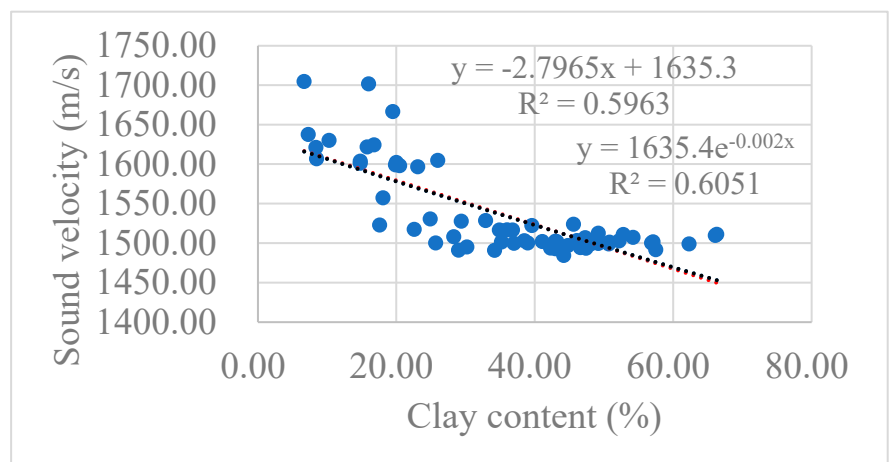

Figure S6. Exponential (black line) + linear (red line) functions of clay content vs sound velocity

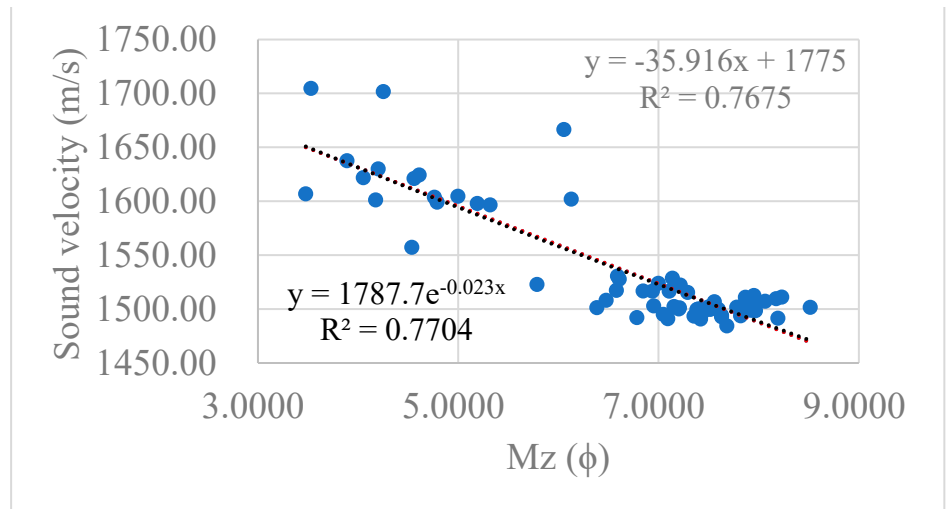

Figure S7. Exponential (black line) + linear (red line) functions of  $Mz$  vs sound velocity

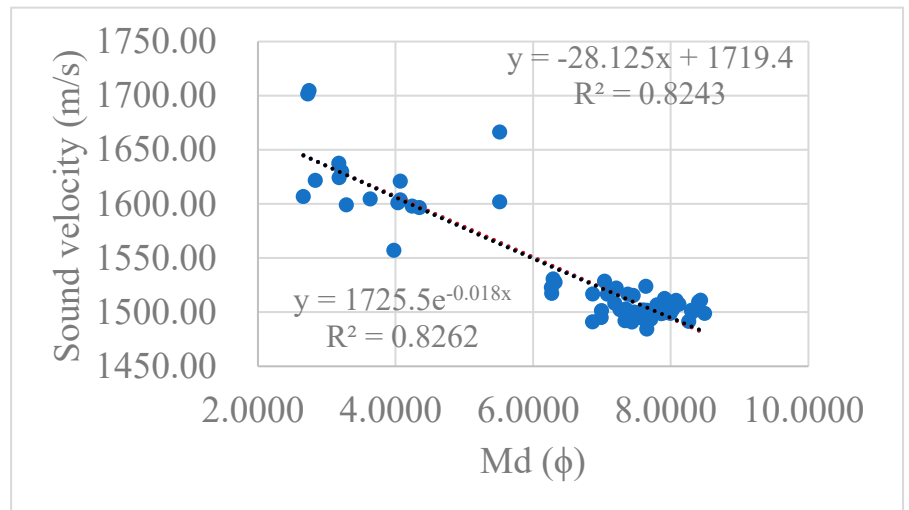

Figure S8. Exponential (black line) + linear (red line) functions of  $Md$  vs sound velocity

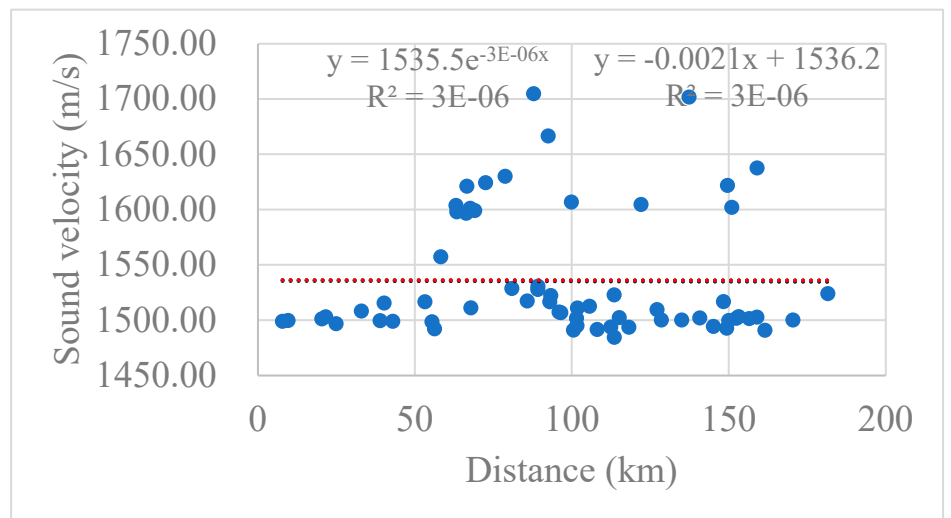

Figure S9. Exponential (black line) + linear (red line) functions of distance vs sound velocity

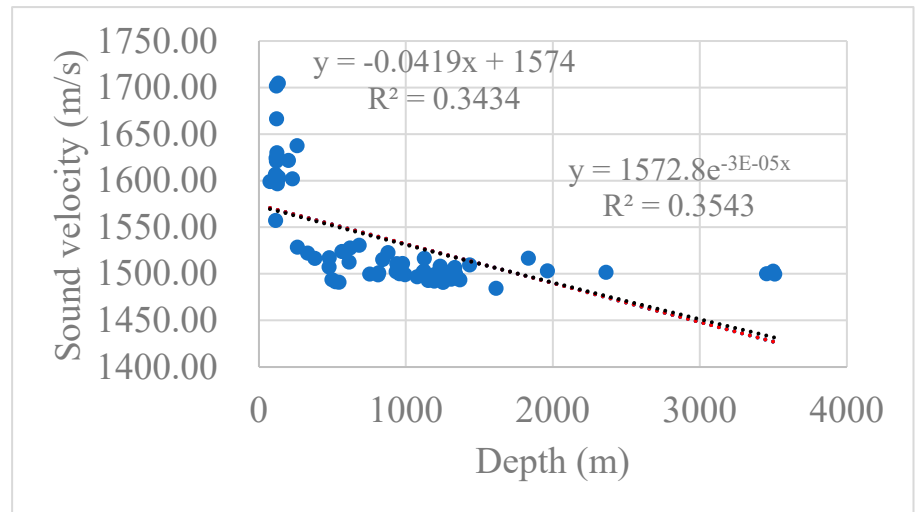

Figure S10. Exponential (black line) + linear (red line) functions of depth vs sound velocity

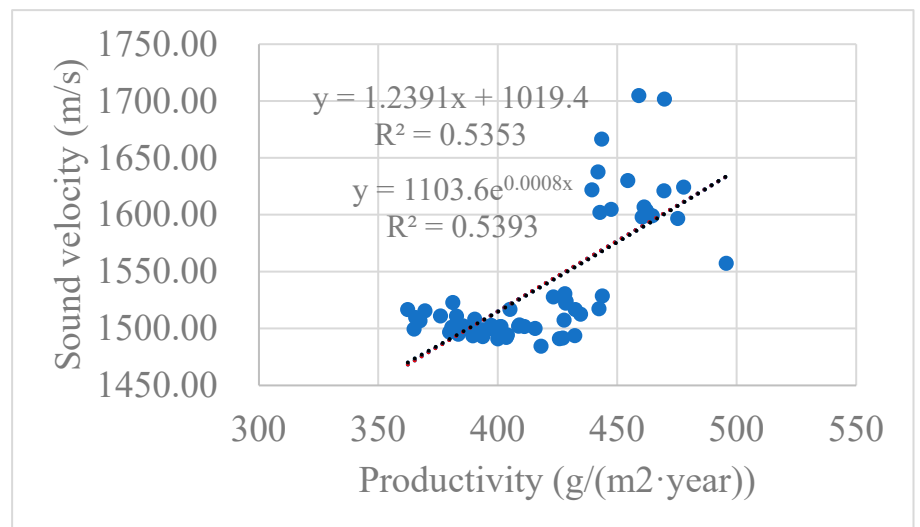

Figure S11. Exponential (black line) + linear (red line) functions of productivity vs sound velocity
